# Supplementary material for: Visualization of halide perovskite crystal growth processes by in situ heating WAXS measurements
Source: Royal Society of Chemistry journal article supplement (doi:10.1039/d0cc08325a), 2021-01-01
Supplement: d0cc08325a5.pdf [file d0cc08325a5.pdf]

# Supplementary Information

## Visualization of halide perovskite crystal growth processes by in situ heating WAXS measurements

Yuiga Nakamura<sup>a</sup>, Naoyuki Shibayama<sup>b†\*</sup>, and Kuniyisa Sugimoto<sup>a,c</sup>

a. Japan Synchrotron Radiation Research Institute/SPring-8, Kouto, Sayo, Hyogo 679-5198, Japan.

b. Department of General Systems Studies, Graduate School of Arts and Sciences, The University of Tokyo, Tokyo, Japan.

c. Institute for Integrated Cell-Material Sciences (WPI-iCeMS), Kyoto University, Sakyo-ku, Kyoto 606-8501, Japan;

†Present Address: Emergent Molecular Function Research Group, RIKEN Center for Emergent Matter Science (CEMS), Wako, Saitama, Japan

### AUTHOR INFORMATION

\*Correspondent Author

Naoyuki Shibayama: naoyuki.shibayama81@gmail.com

## Experimental section

### Fabrication process

*N,N*-dimethylformamide (DMF), dimethyl sulfoxide (DMSO), and  $\gamma$ -butyrolactone (GBL) solutions of  $\text{CH}_3\text{NH}_3\text{PbI}_3$  (MAPbI<sub>3</sub>) (1.0 M) were prepared by dissolving  $\text{PbI}_2$  + MAI with a molar ratio of 1:1 in the desired solvent. The  $\text{TiO}_2$  layer was fabricated following the same experimental conditions and protocol given in the previously published literature.<sup>1,2</sup> Each solution of MAPbI<sub>3</sub> was spin-coated on the  $\text{TiO}_2$  layer at 1000 rpm for 10 sec and at 4000 rpm for 30 sec inside a glove box under an argon atmosphere. During the spin-coating process, chlorobenzene was dropped onto the perovskite layer.<sup>3,4</sup> Finally, the resulting film was attached rapidly to the wide-angle X-ray scattering (WAXS) measurement equipment.

### In situ heating WAXS measurements

We performed in situ heating WAXS measurements to evaluate the process of crystallization from the precursor solution of MAPbI<sub>3</sub>. In situ WAXS patterns were measured at an X-ray incident angle of 5.0° and a photon energy of 12.39 keV using synchrotron radiation at beamline BL46XU of SPring-8, whereby the instrument was equipped with a two-dimensional (2D) X-ray detector (PILATUS300K). During the measurements, the samples were heated from room temperature to 100 °C at a rate of 20 °C/min, and then heated at 100°C for 20 min under a dry N<sub>2</sub> atmosphere.

The scattering patterns  $I_{2D}(q, \chi)$  measured by the 2D detector were azimuthally integrated to obtain the one-dimensional (1D) intensity profiles  $I_{1D}(q)$  as follows:

$$I_{1D}(q) = \frac{1}{2\pi} \int_0^{2\pi} I_{2D}(q, \chi) d\chi$$

where  $q$  is the magnitude of the scattering vector, and  $\chi$  is the azimuthal angle.

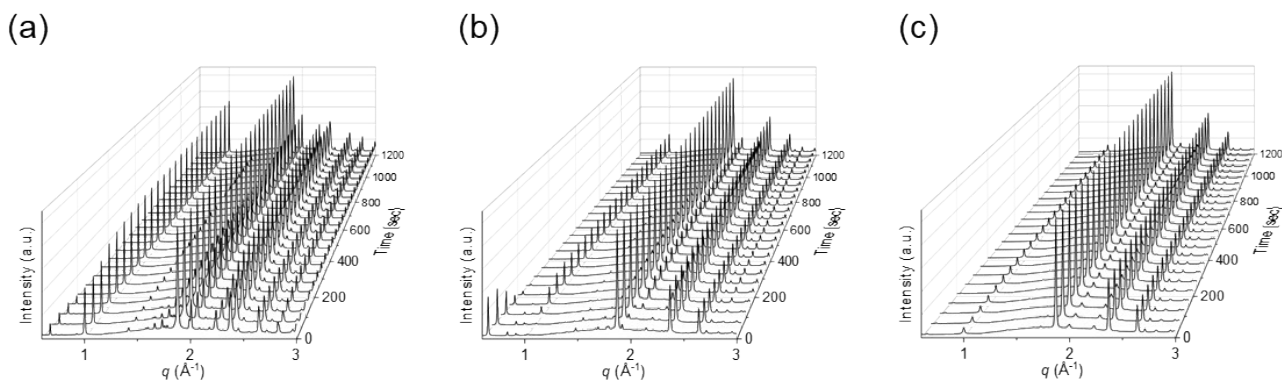

**Fig. S1** Time dependent 1D WAXS profiles up to  $q = 3 \text{ \AA}^{-1}$ , as obtained by azimuthally integrating the 2D WAXS data. For the (a) DMF, (b) DMSO, and (c) GBL systems.

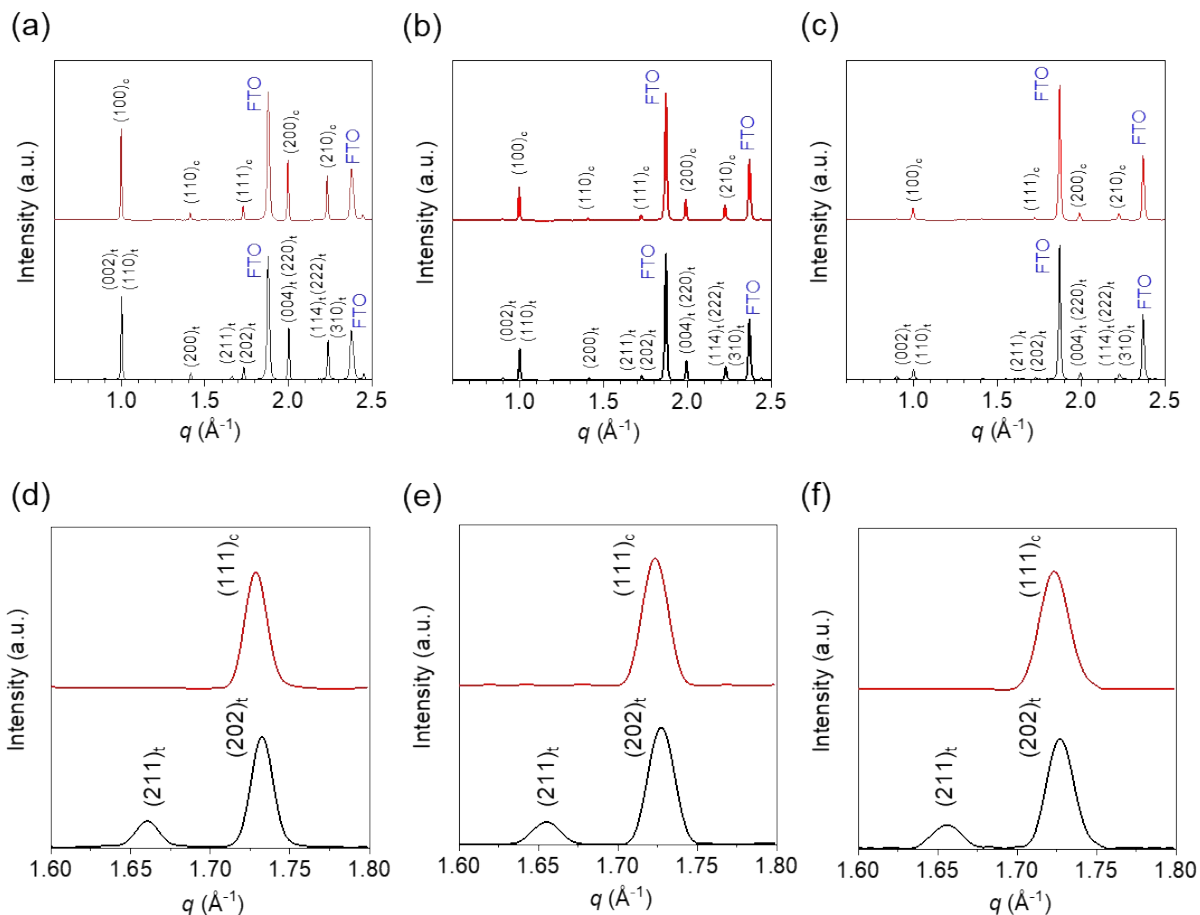

**Fig. S2** 1D WAXS profiles obtained by azimuthally integrating the 2D WAXS data during heating at 100°C (red) and after cooling (black). For the (a) DMF, (b) DMSO, (c) GBL, (d) DMF (near (211)<sub>t</sub> peak), (e) DMSO (near (211)<sub>t</sub> peak), and (f) GBL (near (211)<sub>t</sub> peak) systems.

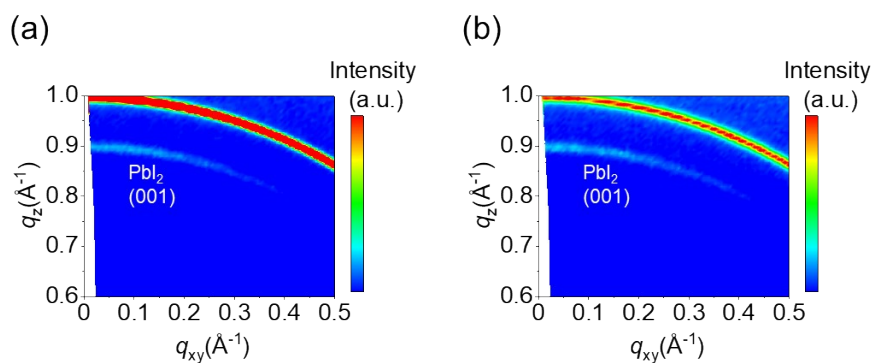

**Fig. S3** 2D WAXS patterns close to the  $\text{PbI}_2$  (001) diffraction peak after 20 min for the cases of (a) DMSO, (b) GBL.

## Reference

1. H. Kanda, N. Shibayama, A. UZum, T. Umeyama, H. Imahori, Y.-H. Chiang, P. Chen, M. K. Nazeeruddin, and S. Ito, *Mater. Today Energy*, 2018, **7**, 190.
2. H. Kanda, N. Shibayama, A. Uzum, T. Umeyama, H. Imahori, K. Ibi, and S. Ito, *ACS Appl. Mater. Interfaces*, 2018, **10**, 35016.
3. N. J. Jeon, J. H. Noh, Y. C. Kim, W. S. Yang, S. Ryu, and S. I. Seok, *Nat. Mater.*, 2014, **13**, 897.
4. M. Saliba, J.-P. Correa-Baena, C. M. Wolff, M. Stolterfoht, N. Phung, S. Albrecht, D. Neher and A. Abate, *Chem. Mater.*, 2018, **30**, 4193.
